# Supplementary material for: Two-year trends and predictors of e-cigarette use in 27 European Union member states
Source: PubMed Central journal article supplement — Tob Control. 2016 May 24;26(1):98–104. doi: 10.1136/tobaccocontrol-2015-052771 (PMC5256312; doi:10.1136/tobaccocontrol-2015-052771), 2016-05-24
Supplement: tobaccocontrol-2015-052771supp_table.pdf [file tobaccocontrol-2015-052771supp_table.pdf]

**Supplementary Table 1: Characteristics of sample in 2012 and 2014**

|                               |                                     | <b>2012<br/>% (95% CI)</b> | <b>2014<br/>% (95% CI)</b> |
|-------------------------------|-------------------------------------|----------------------------|----------------------------|
| Gender                        |                                     |                            |                            |
|                               | Female                              | 51.7 (50.7-52.6)           | 51.6 (50.6-52.6)           |
|                               | Male                                | 48.3 (47.4-49.3)           | 48.4 (47.4-49.4)           |
| Age (years)                   |                                     |                            |                            |
|                               | ≥55                                 | 35.1 (34.3-36.0)           | 36.6 (35.7-37.5)           |
|                               | 40-54                               | 25.9 (25.0-26.7)           | 26.0 (25.1-26.8)           |
|                               | 25-39                               | 24.7 (23.9-25.5)           | 23.9 (23.1-24.8)           |
|                               | 18-24                               | 14.4 (13.6-15.1)           | 13.5 (12.8-14.3)           |
| Education (age at completion) |                                     |                            |                            |
|                               | ≤15                                 | 21.1 (20.4-21.9)           | 18.8 (18.0-19.5)           |
|                               | 16-19                               | 47.6 (46.7-48.6)           | 47.3 (46.3-48.3)           |
|                               | ≥20                                 | 31.2 (30.4-32.1)           | 33.9 (33.0-34.9)           |
| Area of residence             |                                     |                            |                            |
|                               | Rural                               | 34.0 (33.1-34.9)           | 29.0 (28.1-29.8)           |
|                               | Urban                               | 66.0 (65.1-66.9)           | 71.0 (70.2-71.9)           |
| Difficulty in paying bills    |                                     |                            |                            |
|                               | Almost never/ never                 | 63.8 (62.9-64.7)           | 66.4 (65.4-67.3)           |
|                               | From time to time/ Most of the time | 36.2 (35.3-37.1)           | 33.6 (32.7-34.6)           |
| Smoking status                |                                     |                            |                            |
|                               | Never smoker                        | 50.7 (49.8-51.6)           | 54.3 (53.4-55.3)           |
|                               | Current smoker                      | 27.9 (27.1-28.8)           | 26.2 (25.3-27.1)           |
|                               | Former smoker                       | 21.4 (20.6-22.1)           | 19.5 (18.7-20.2)           |
